# Supplementary material for: Boosting the sodium storage of the 1T/2H MoS2@SnO2 heterostructure via a fast surface redox reaction
Source: Royal Society of Chemistry journal article supplement (doi:10.1039/d0ta08711d), 2020-12-08
Supplement: d0ta08711d1.pdf [file d0ta08711d1.pdf]

## Supporting information

### Boosting the Sodium Storage of 1T/2H MoS<sub>2</sub>@SnO<sub>2</sub>

#### Heterostructure via Fast Surface Redox Reaction

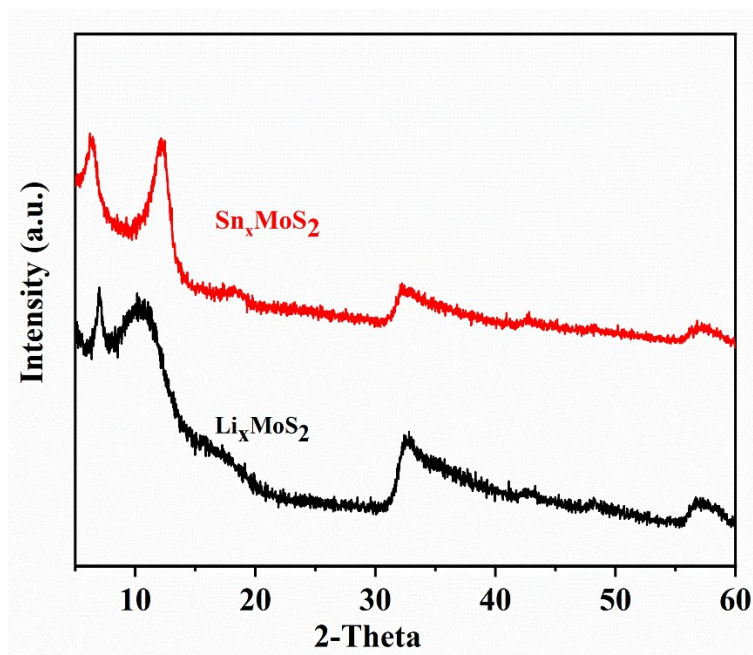

**Figure S1.** XRD pattern of  $\text{Li}^+$  and  $\text{Sn}^{2+}$  intercalated MoS<sub>2</sub>. The XRD peaks corresponding to (001) and (002) reflections were found, suggesting there is a water bilayer in the as-deposited film.

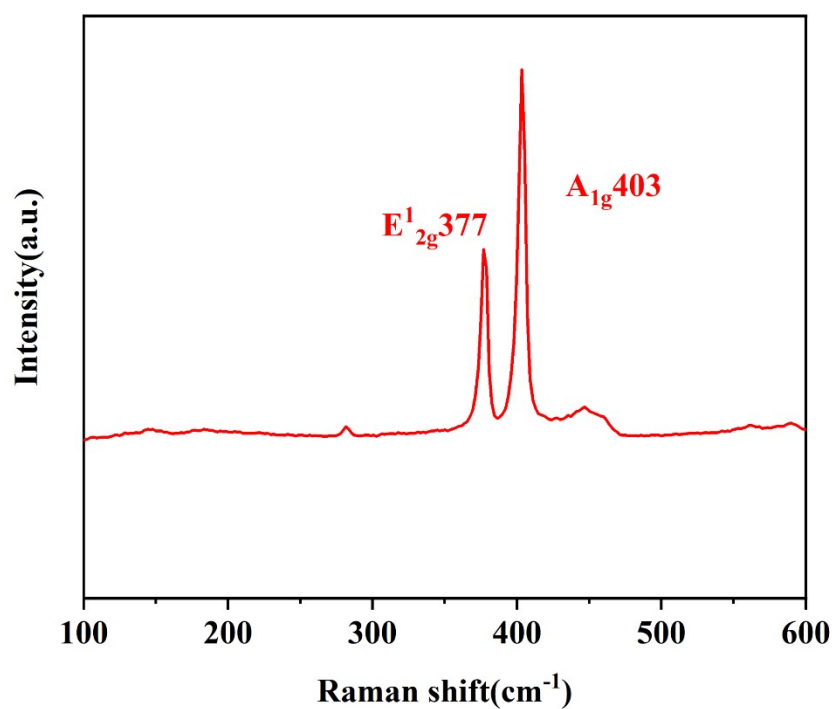

**Figure S2.** Raman spectra of 2H MoS<sub>2</sub>@SnO<sub>2</sub>

## Supporting information

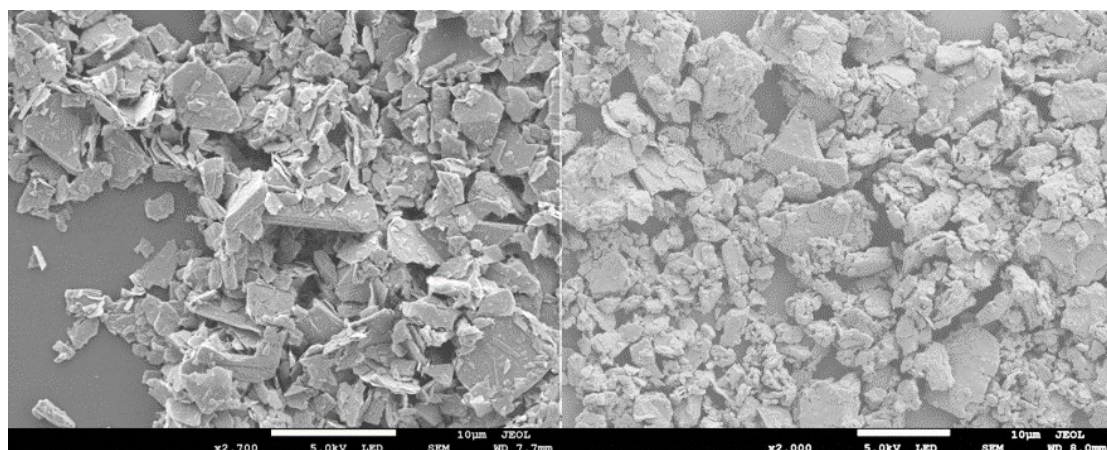

**Figure S3.** SEM images of raw MoS<sub>2</sub> and 1T/2H MoS<sub>2</sub>@SnO<sub>2</sub>

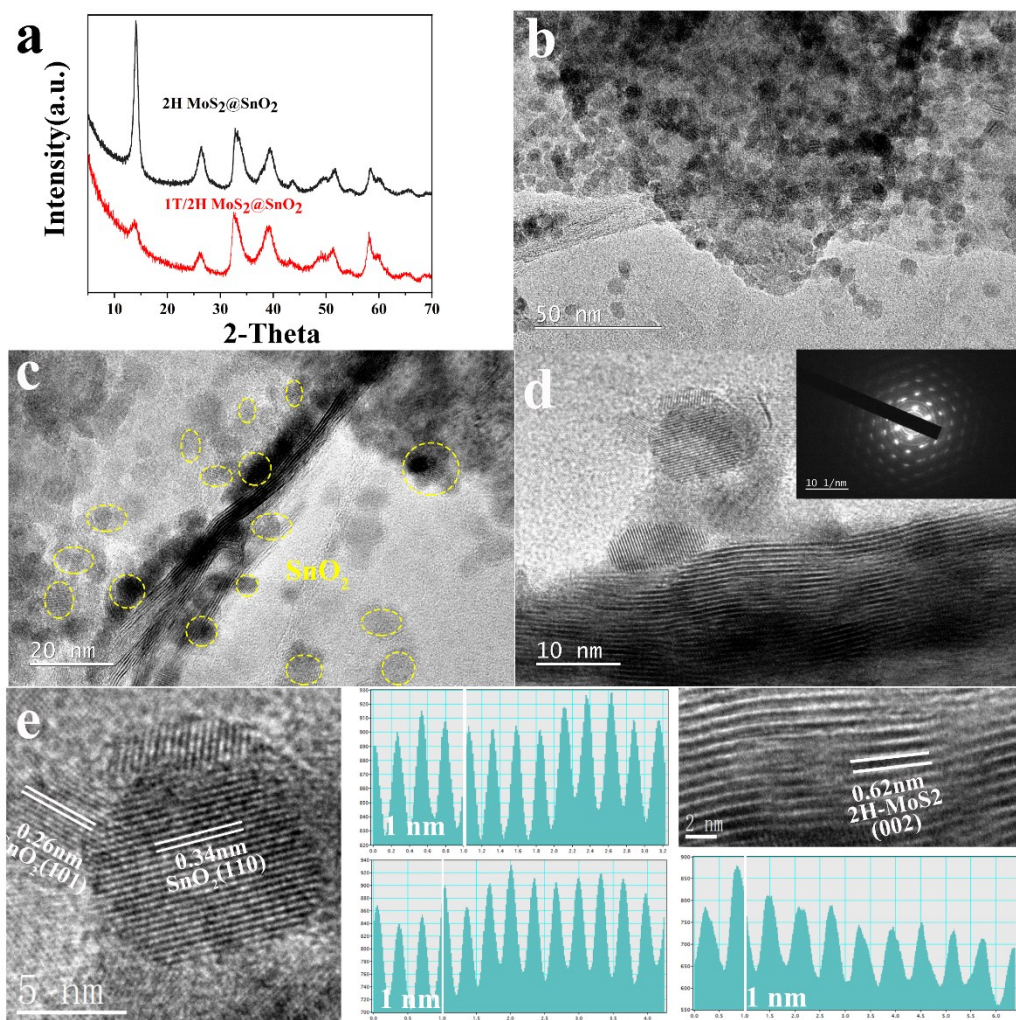

**Figure S4.** a) XRD patterns of 2H MoS<sub>2</sub>@SnO<sub>2</sub> and 1T/2H MoS<sub>2</sub>@SnO<sub>2</sub>. b-d) TEM images of 2H MoS<sub>2</sub>@SnO<sub>2</sub>, the inset of d shows the corresponding SEAD pattern. e) The HRTEM images of 2H MoS<sub>2</sub>@SnO<sub>2</sub>, and their corresponding profile plots of the calibration for measuring the spacings in panel of SnO<sub>2</sub> and 2H-MoS<sub>2</sub>.

## Supporting information

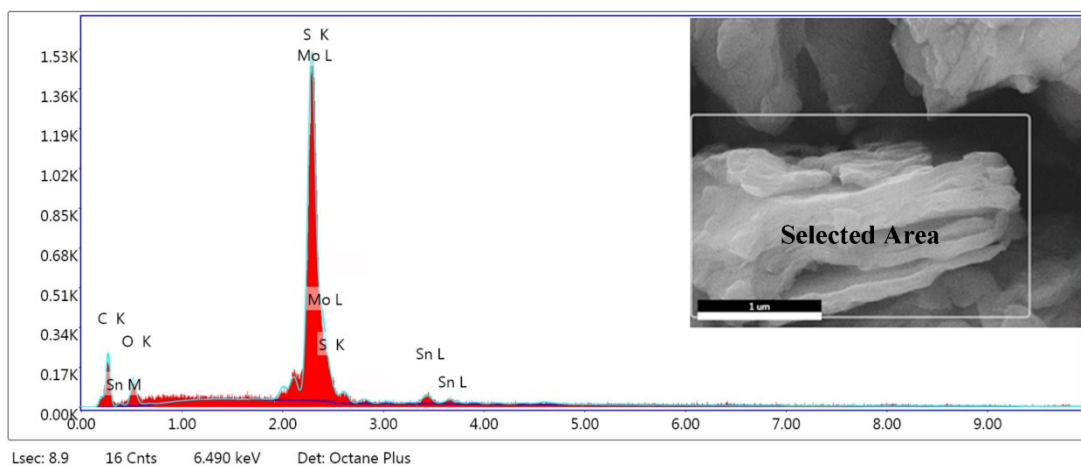

**Figure S5.** The energy dispersive X-ray spectrum of 1T/2H MoS<sub>2</sub>@SnO<sub>2</sub>.

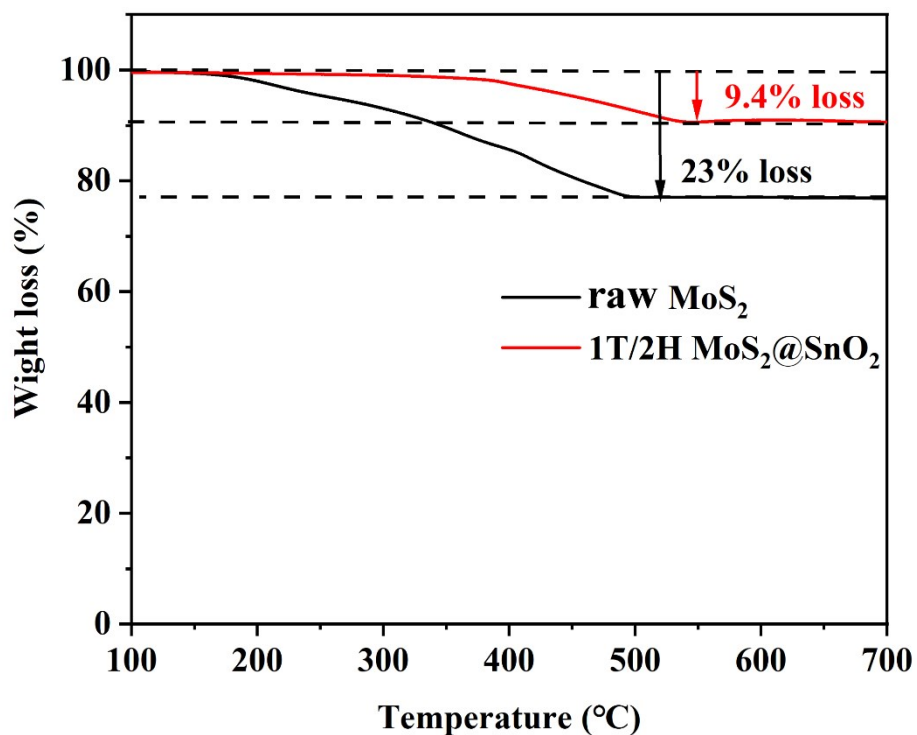

**Figure S6.** TGA curves of 1T/2H MoS<sub>2</sub>/SnO<sub>2</sub> composite (without graphene) and bulk MoS<sub>2</sub>. Assuming the weigh percent of MoS<sub>2</sub> and SnO<sub>2</sub> are  $x$ ,  $y$  respectively. The mass ratio of MoS<sub>2</sub> and SnO<sub>2</sub> is calculated to be 40.9:59.1 based on the following equations:  $x+y=1$  and  $77\%x+y=90.6\%$ .

## Supporting information

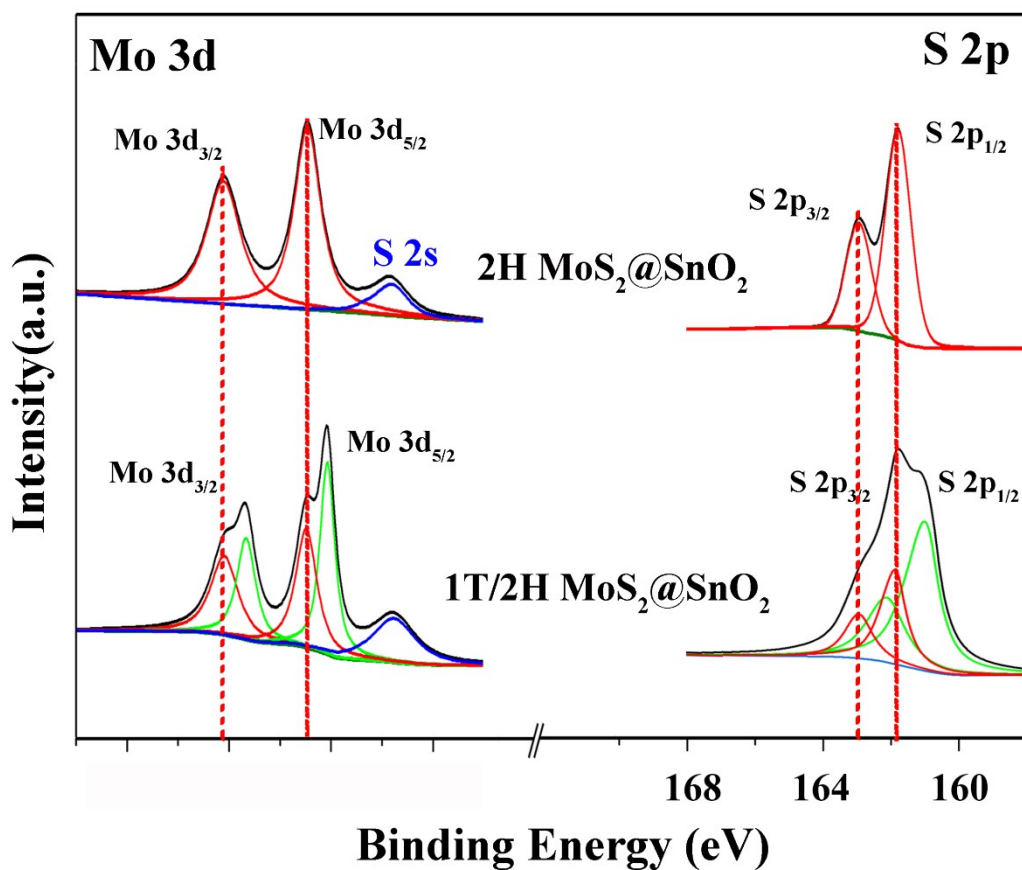

**Figure S7.** High resolution XPS spectra of Mo 3d and S 2p in 2H MoS<sub>2</sub>@SnO<sub>2</sub> and 1T/2H MoS<sub>2</sub>@SnO<sub>2</sub>, respectively.

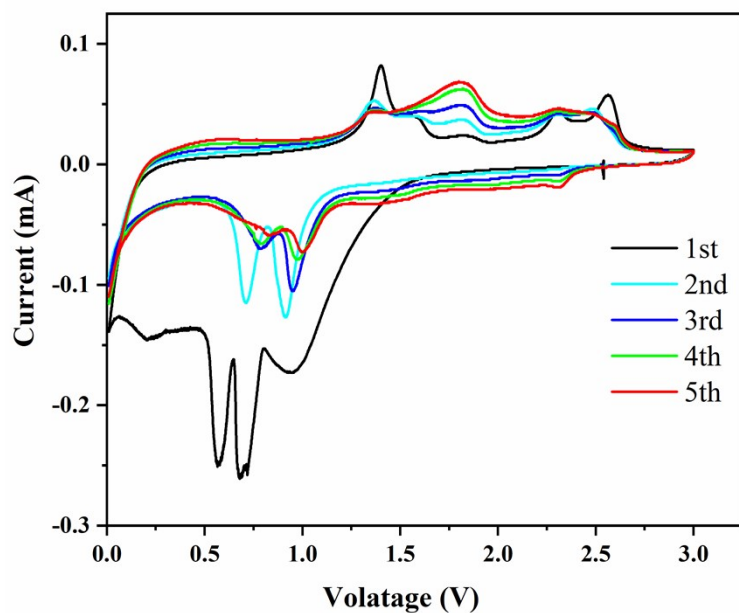

**Figure S8.** CV curves of raw MoS<sub>2</sub> for the initial 5 cycles.

## Supporting information

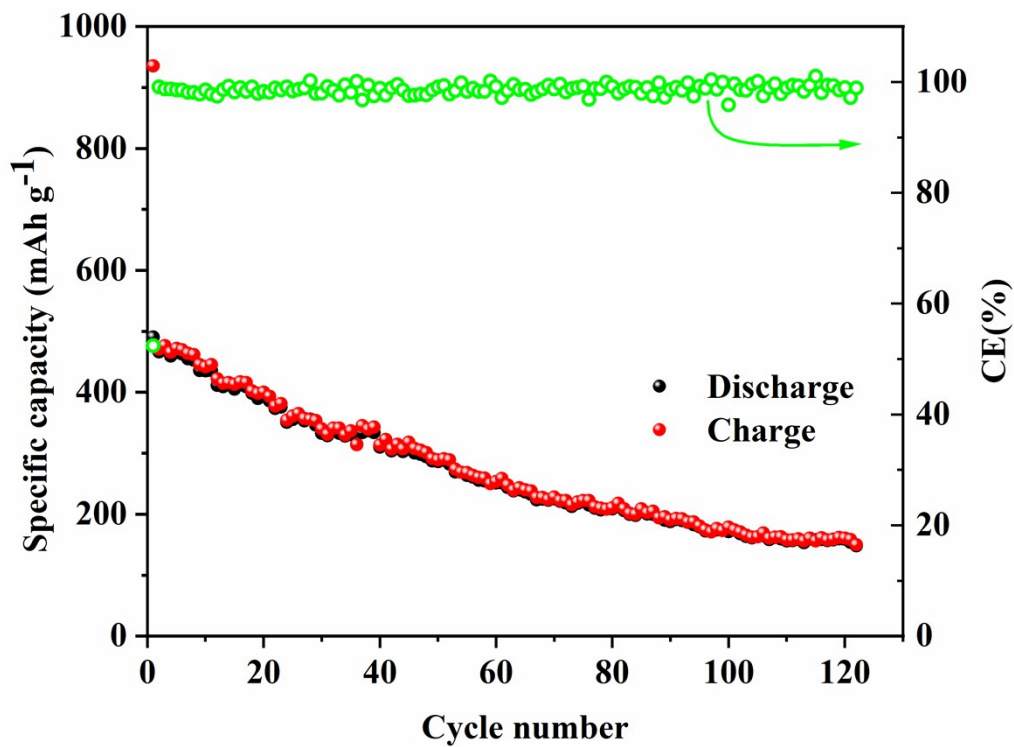

Figure S9. Cycling performance and CE of the exfoliated MoS<sub>2</sub>.

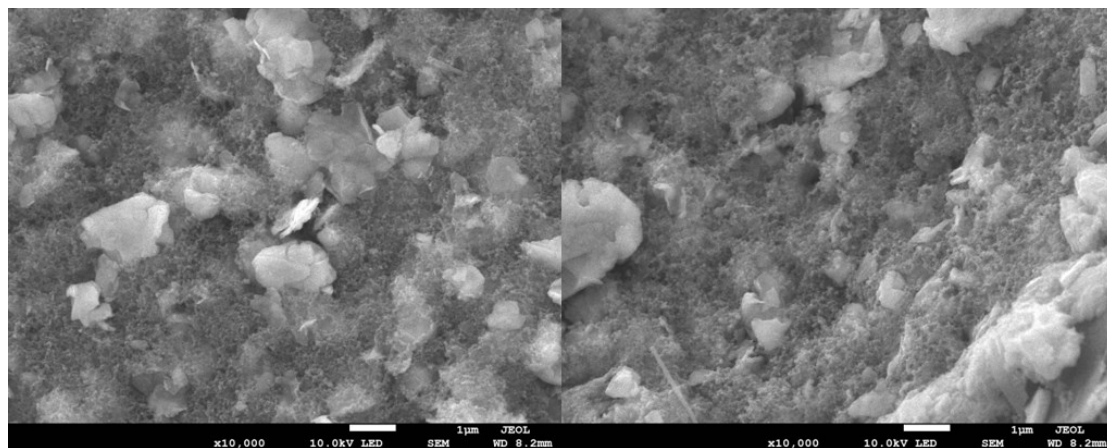

Figure S10. a) SEM images of a) initial and b) cycled anode.

## Supporting information

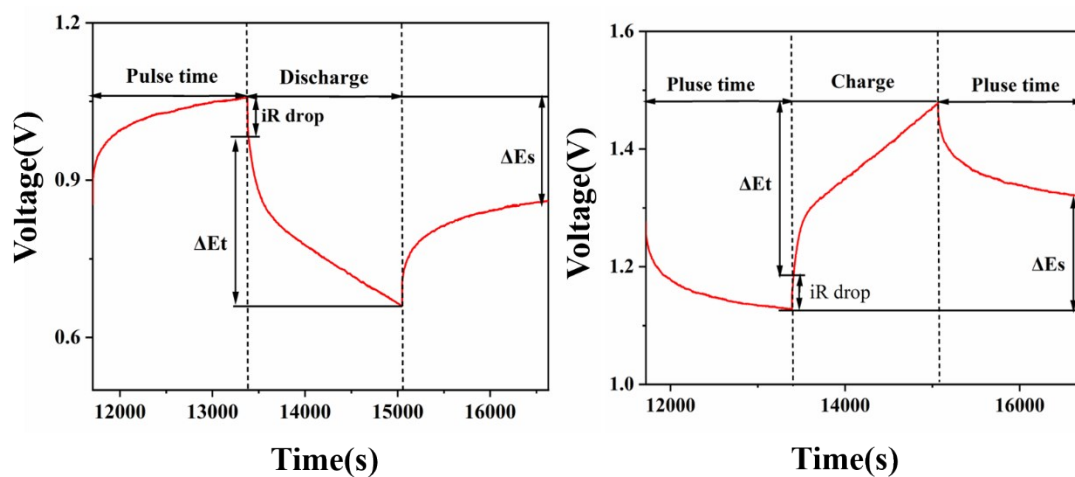

**Figure S11.** Typical E-t curves of 1T/2H MoS<sub>2</sub>@SnO<sub>2</sub> for a single GITT step during charge and discharge.

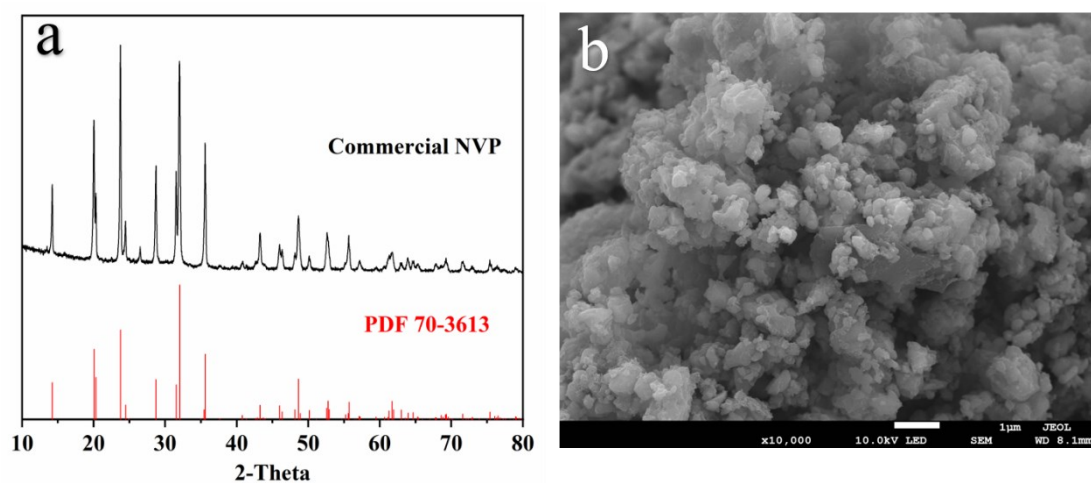

**Figure S12.** a) XRD pattern and b) SEM image of NVP

## Supporting information

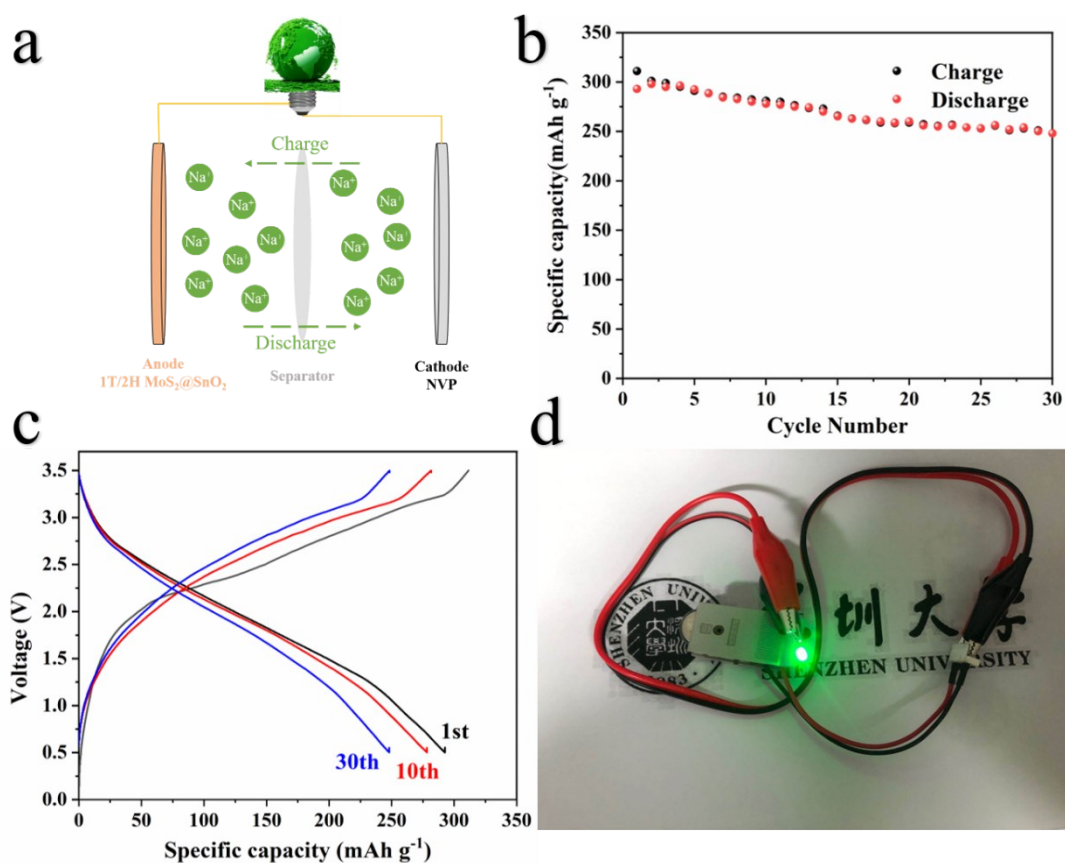

**Figure S13.** a) Schematic illustration of full-cell test. b) cycling performance of the full cell at  $0.5 \text{ A g}^{-1}$ . c) charge and discharge curves of  $1\text{T}/2\text{H MoS}_2@\text{SnO}_2//\text{NVP}$  d) small lamp was lightened by full cell.

## Supporting information

**Table S1.** Comparison of the achievement on SIB anode of the published literature against the current work.

| Material                                     | Preparation method           | Cyclic performance                                                       | Rate performance                                                       | Ref.             |
|----------------------------------------------|------------------------------|--------------------------------------------------------------------------|------------------------------------------------------------------------|------------------|
| <b>1T/2H MoS<sub>2</sub>@SnO<sub>2</sub></b> | Charge-induced self-assembly | 537mAh g <sup>-1</sup><br>at 0.1A g <sup>-1</sup><br>after 100 cycle     | 262mAh g <sup>-1</sup><br>at 2A g <sup>-1</sup><br>after 500 cycles    | <b>This work</b> |
| <b>Dual phase- MoS<sub>2</sub></b>           | Solvothermal                 | 300mAh g <sup>-1</sup><br>at 0.5Ag <sup>-1</sup><br>after 200 cycles     | 220mAh g <sup>-1</sup><br>at 2.0 A g <sup>-1</sup><br>after 500 cycles | S <sup>1</sup>   |
| <b>1T MoS<sub>2</sub>/CF</b>                 | Solvothermal                 | 313mAh g <sup>-1</sup><br>at 0.05 A g <sup>-1</sup><br>after 200 cycles  | 175mAh g <sup>-1</sup><br>at 2.0 A g <sup>-1</sup><br>after 200 cycles | S <sup>2</sup>   |
| <b>MoS<sub>2x</sub>Se<sub>x</sub>/GF</b>     | Hydrothermal and calcination | 165mAh g <sup>-1</sup><br>at 0.2 A g <sup>-1</sup><br>after 500 cycles   | 175mAh g <sup>-1</sup><br>at 2.0 A g <sup>-1</sup><br>after 500 cycles | S <sup>3</sup>   |
| <b>MoS<sub>2</sub>@SnO<sub>2</sub>@C</b>     | Hydrothermal                 | 396mA h g <sup>-1</sup><br>at 0.1 A g <sup>-1</sup><br>after 150 cycles  | 230mAh g <sup>-1</sup><br>at 1.0 A g <sup>-1</sup><br>after 450 cycles | S <sup>4</sup>   |
| <b>S/MoS<sub>2</sub></b>                     | Calcination                  | 413.2mA h g <sup>-1</sup><br>at 0.1 A g <sup>-1</sup><br>after 60 cycles | 302mAh g <sup>-1</sup><br>at 2.0 A g <sup>-1</sup><br>after 300 cycles | S <sup>5</sup>   |
| <b>MoS<sub>2</sub>/Graphene</b>              | Ball-milling                 | 432mA h g <sup>-1</sup><br>at 0.1 A g <sup>-1</sup><br>after 60 cycles   | 421mAh g <sup>-1</sup><br>at 0.3 A g <sup>-1</sup><br>after 300 cycles | S <sup>6</sup>   |
| <b>1T MoS<sub>2</sub></b>                    | Li intercalated exfoliation  | 450mA h g <sup>-1</sup><br>at 0.05 A g <sup>-1</sup><br>after 40 cycles  | 324mAh g <sup>-1</sup><br>at 1.0 A g <sup>-1</sup><br>after 200 cycles | S <sup>7</sup>   |
| <b>G-MoS<sub>2</sub></b>                     | Vapor synthesis              | 312mA h g <sup>-1</sup><br>at 0.5 A g <sup>-1</sup><br>after 300 cycles  | 175mAh g <sup>-1</sup><br>at 2.0 A g <sup>-1</sup><br>after 400 cycles | S <sup>8</sup>   |



# Supporting information

## Reference

1. J. Wu, J. Liu, J. Cui, S. Yao, M. Ihsan-Ul-Haq, N. Mubarak, E. Quattrocchi, F. Ciucci and J.-K. Kim, *J. Mater Chem. A*, 2020, **8**, 2114-2122.
2. X. Geng, Y. Jiao, Y. Han, A. Mukhopadhyay, L. Yang and H. Zhu, *Adv. Funct. Mater*, 2017, **27**,170998.
3. G. Jia, D. Chao, N. H. Tiep, Z. Zhang and H. J. Fan, *Energy Storage Materials*, 2018, **14**, 136-142.
4. Z. Chen, D. Yin and M. Zhang, *Small*, 2018, **14**, e1703818.
5. Z. Xu, K. Yao, Z. Li, L. Fu, H. Fu, J. Li, L. Cao and J. Huang, *J. Mater Chem. A*, 2018, **6**, 10535-10542.
6. D. Sun, D. Ye, P. Liu, Y. Tang, J. Guo, L. Wang and H. Wang, *Adv. Energy Mater*, 2018, **8**.
7. D. Sun, D. Huang, H. Wang, G. Xu, X. Zhang, R. Zhang, Y. Tang, D. Abd Ei-Hady, W. Alshitari, A. Saad Al-Bogami, K. Amine and M. Shao, *Nano Energy*, 2019, **61**, 361-369.
8. K. Yao, Z. Xu, Z. Li, X. Liu, X. Shen, L. Cao and J. Huang, *ChemSusChem*, 2018, **11**, 2130-2137.
